# Supplementary material for: Characterizing Cold Days and Spells and Their Relationship with Cold-Related Mortality in Bangladesh
Source: MDPI journal article supplement (doi:10.3390/s23052832), 2023-03-05
Supplement: s1 [file s1]

## Supplementary Information

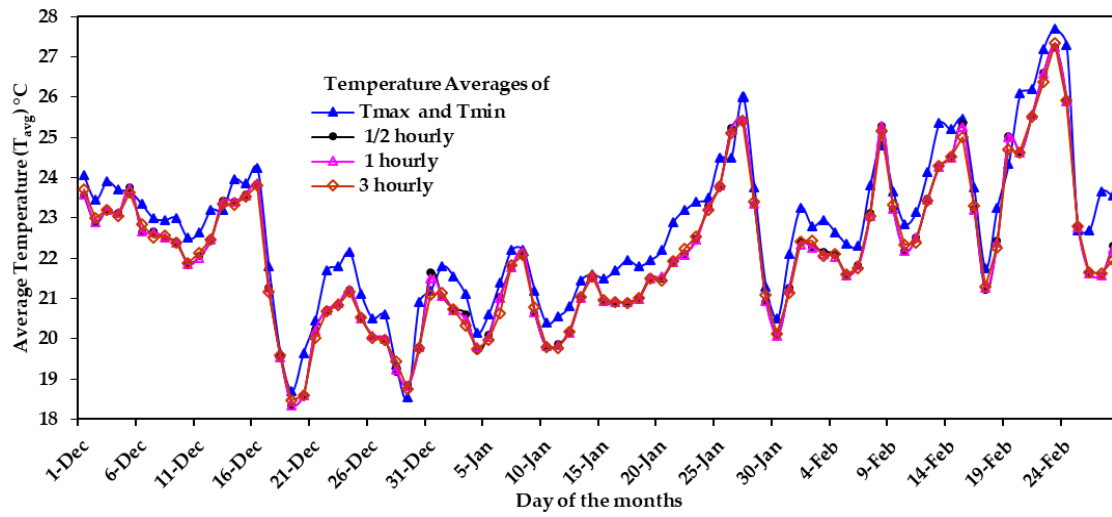

**Figure S1:** Example case of calculating  $T_{avg}$  using  $\frac{1}{2}$  hour, 1 hour, and 3 hourly  $T_a$  data; and daily  $T_{max}$  and  $T_{min}$  data during the 2018-2019 winter season at Dhaka University Automatic weather station.
